# Supplementary material
Source: PubMed Central journal article supplement (PMC3421596)

**Supplementary to**  
**Leiros et al., Crystal Structure of the Mobile Metallo- $\beta$ -Lactamase AIM-1 from *Pseudomonas aeruginosa*: Insights into Antibiotic Binding and the role of Gln157.**

**Figure S1** 2Fo-Fc electron density map at 1.2  $\sigma$  for the a) AIM-1-Q157A and b) AIM-1-Q157N crystal structures. c) The AIM-1-Q157A (cyan) and d) the AIM-1-Q157N (cyan) structures with docked hydrolysed cefoxitin (magenta) and the AIM-1 (white) structure (Q157) superimposed.

a) AIM-1-Q157A

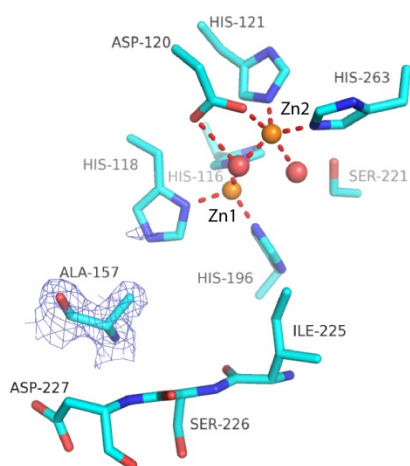

b) AIM-1-Q157N

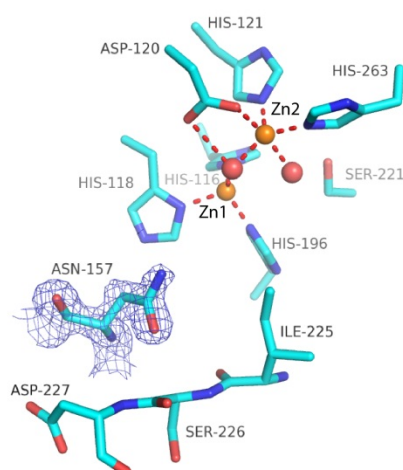

c) AIM-1-Q157A

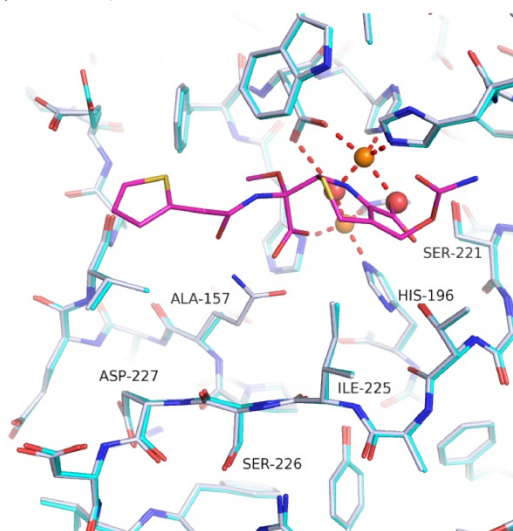

d) AIM-1-Q157N

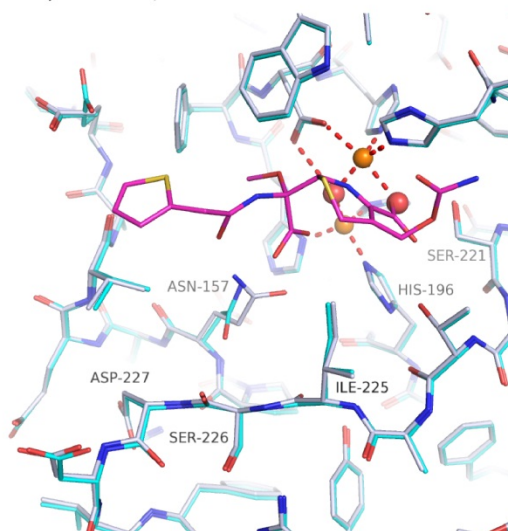

Supplement: AAC.00448-12_zac999101132so1.pdf [file AAC.00448-12_zac999101132so1.pdf]
